# Supplementary material
Source: Springer Nature journal article supplement (https://www.springermedizin.de/resource/supplementary/13046_2010_295_MOESM4_ESM.pdf/9662058)

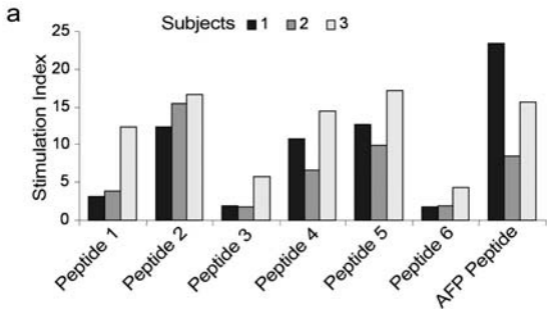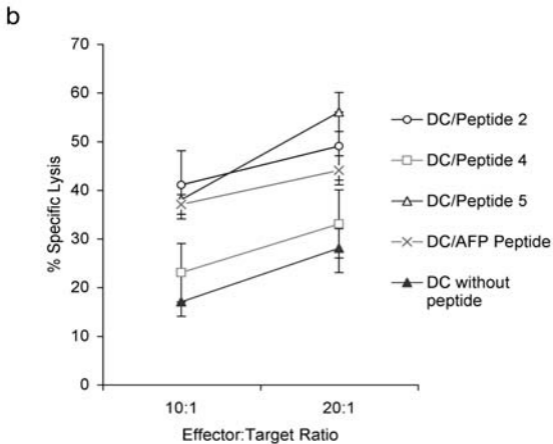

Supplement: MOESM4 [file 9662058]
